# Supplementary material for: Cu nanoparticles confined in siliceous MFI zeolite for methanol steam reforming
Source: Royal Society of Chemistry journal article supplement (doi:10.1039/d3cy01165h), 2023-01-01
Supplement: d3cy01165h1.pdf [file d3cy01165h1.pdf]

## Supporting Information

### Cu nanoparticles confined in siliceous MFI zeolite for methanol steam reforming

Yang Hong<sup>a,b</sup>, Yijun Zheng<sup>a</sup>, Nana Yan<sup>a,b</sup>, Xiaona Liu<sup>a,b</sup>, Peng Guo,<sup>\* a,b</sup> Zhongmin, Liu<sup>a,b</sup>

---

<sup>a</sup> *National Engineering Research Center of Lower-Carbon Catalysis Technology, State Energy Low Carbon Catalysis and Engineering R&D Center, Dalian National Laboratory for Clean Energy, Dalian Institute of Chemical Physics, Chinese Academy of Sciences. Dalian, China.*

<sup>b</sup> *University of Chinese Academy of Sciences. Beijing, China.*

---

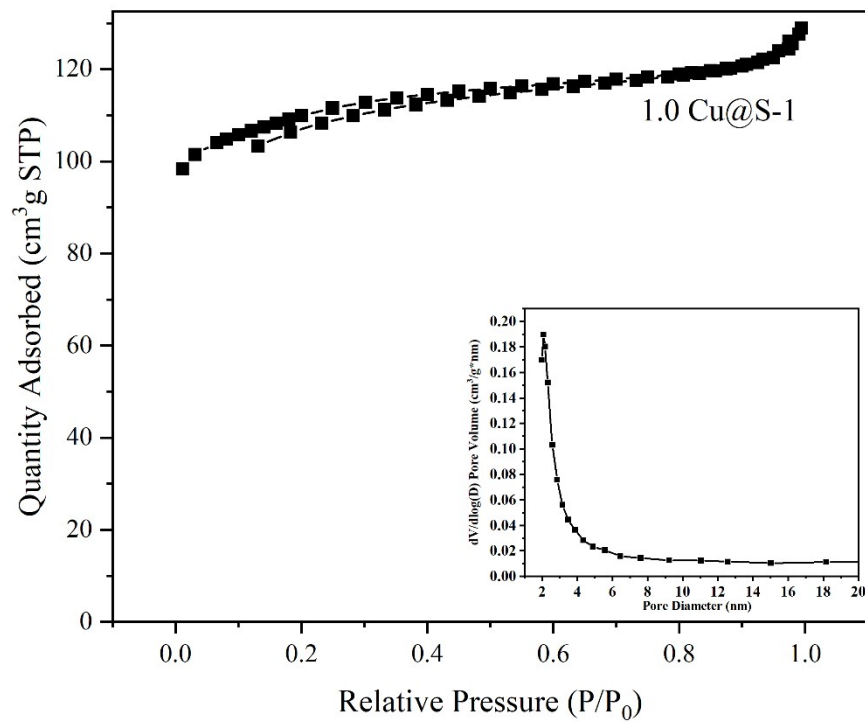

Fig. S1. N<sub>2</sub> adsorption-desorption isotherms of 1.0 Cu@S-1

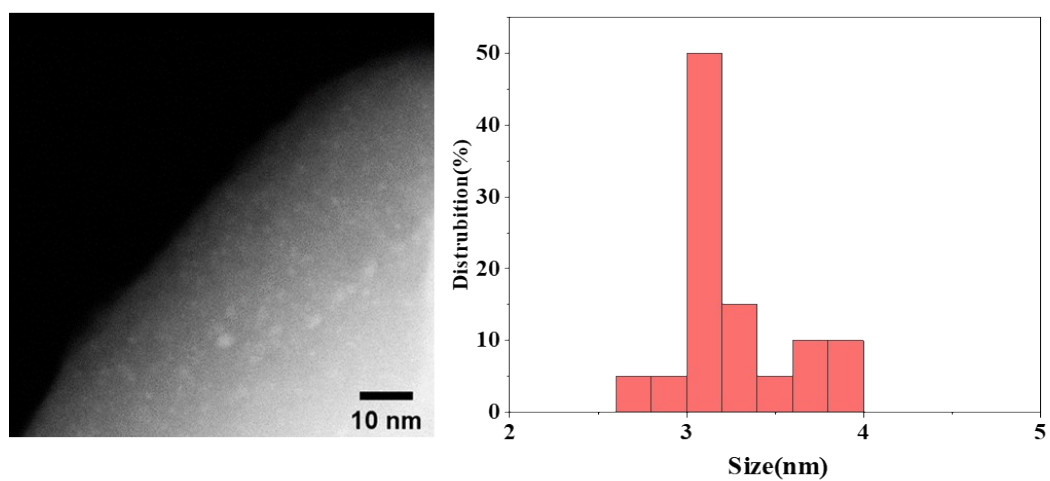

Fig. S2. HAADF-STEM image and corresponding Cu nanoparticles size distribution of the calcined 1.0 Cu/S-1

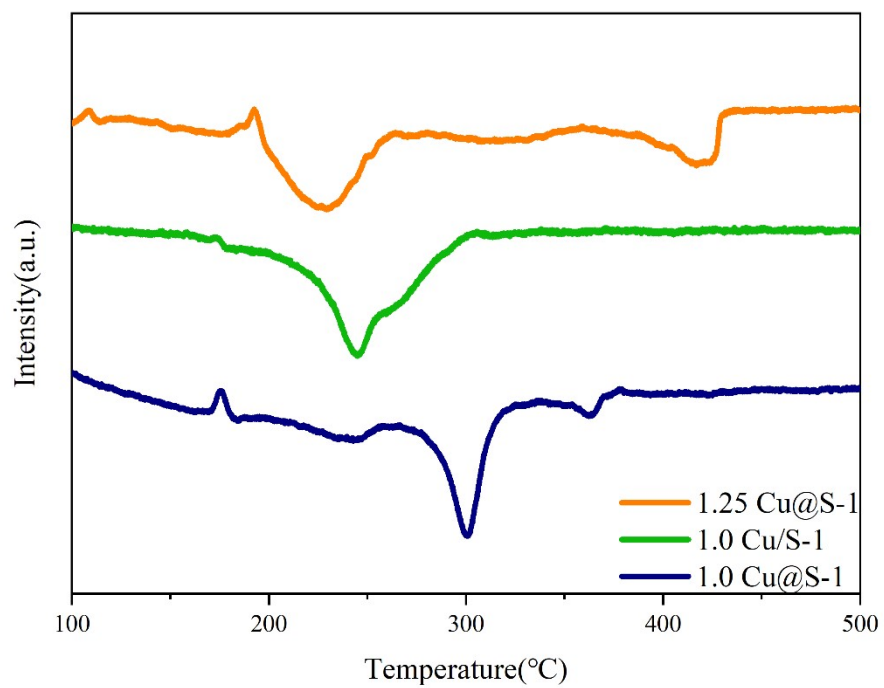

Fig. S3. H<sub>2</sub>-TPR profile of 1.0 Cu@S-1, 1.0 Cu/S-1 and 1.25 Cu@S-1

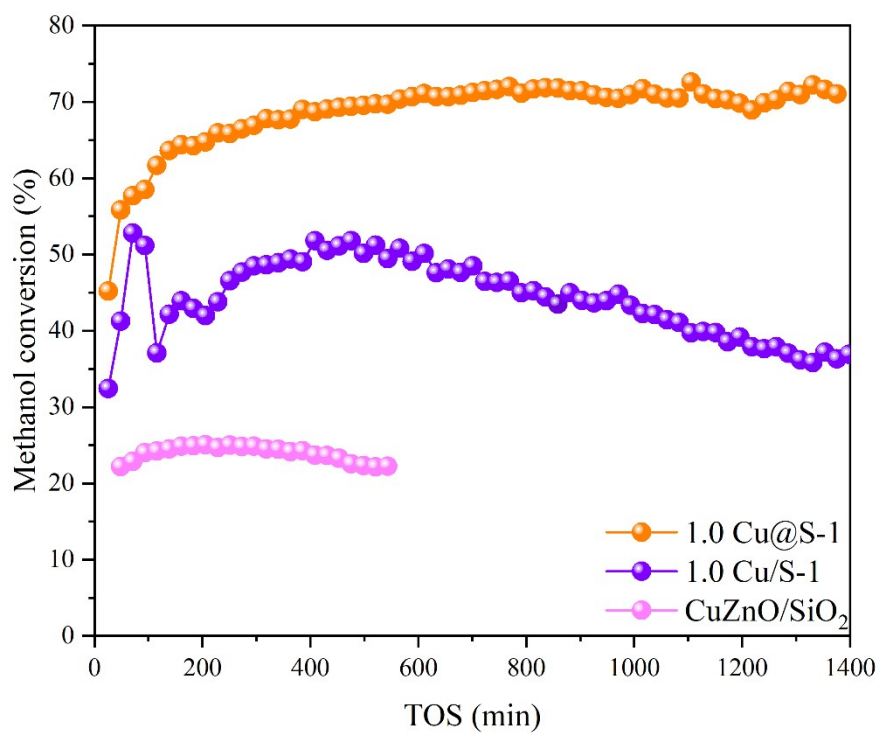

Fig. S4. Stability of 1.0 Cu@S-1, 1.0 Cu/S-1 and CuZnO/SiO<sub>2</sub> at 300°C (Reaction condition: 44% methanol, N<sub>2</sub> at a rate of 34 ml/min, WHSV = 4.55h<sup>-1</sup>, 1 atm.)

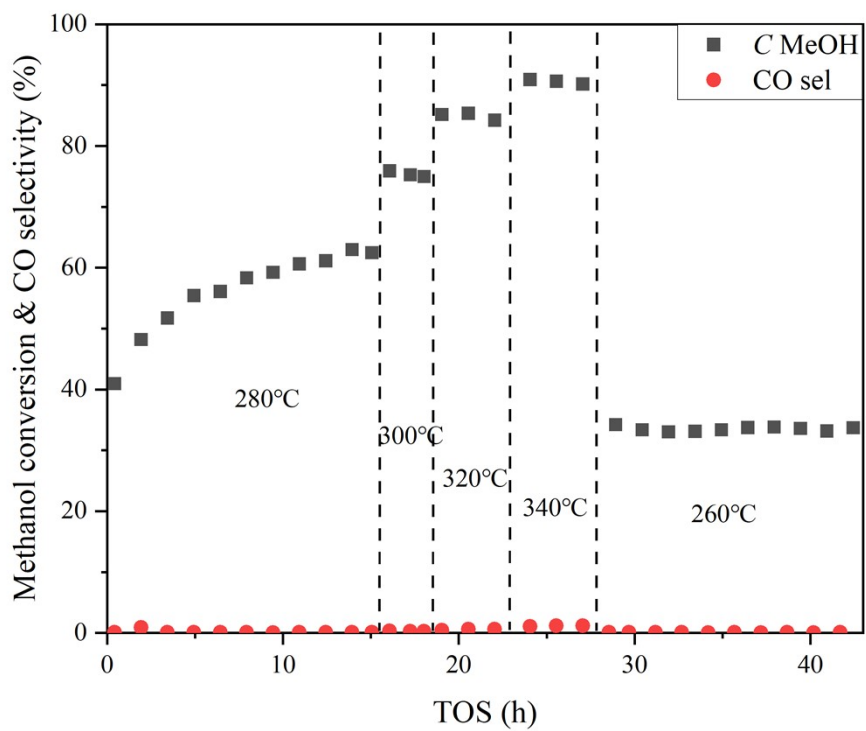

Fig. S5. TOS-dependent MSR performance of 1.0 Cu@S-1 catalyst under different temperature. (Reaction condition: 44% methanol, N<sub>2</sub> at a rate of 34 ml/min, WHSV = 4.55h<sup>-1</sup>, 1 atm.)

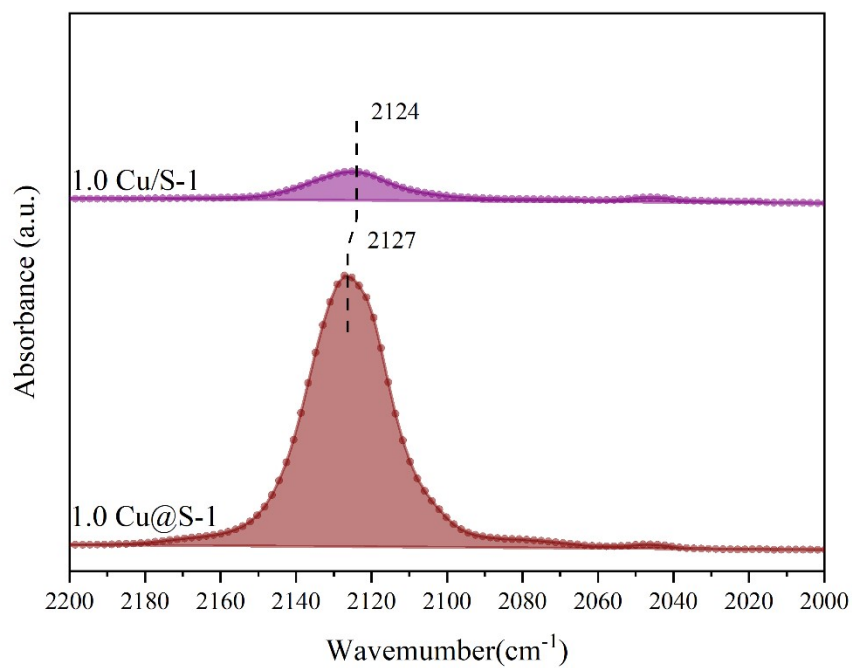

Fig. S6. *In-situ* CO-FTIR spectra of the reduced 1.0 Cu@S-1 and 1.0 Cu/S-1.

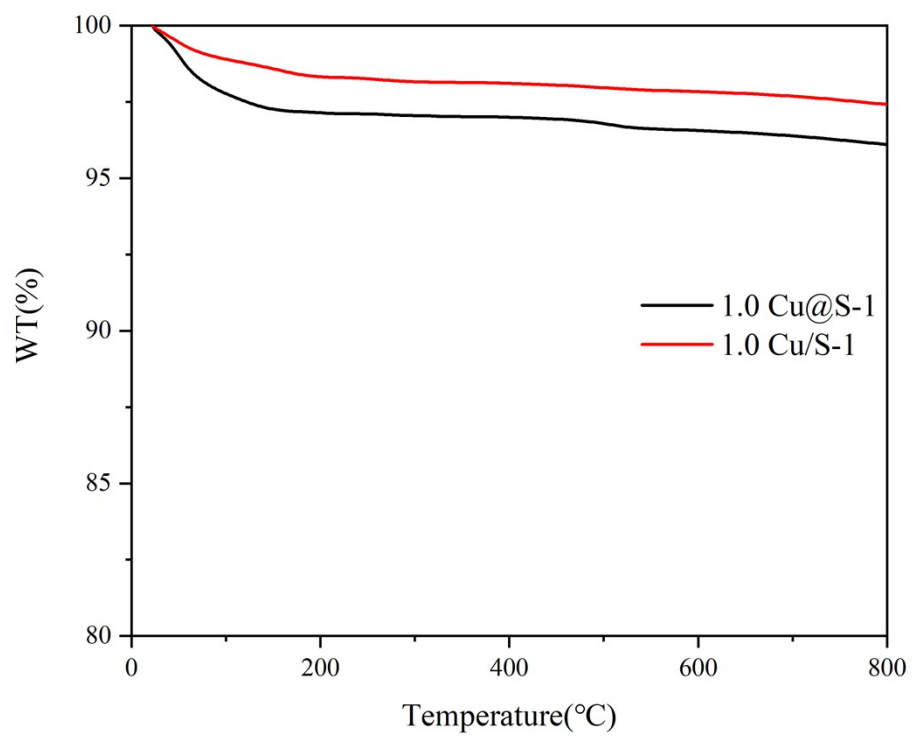

Fig. S7. TGA results of the spent 1.0 Cu@S-1 and 1.0 Cu/S-1



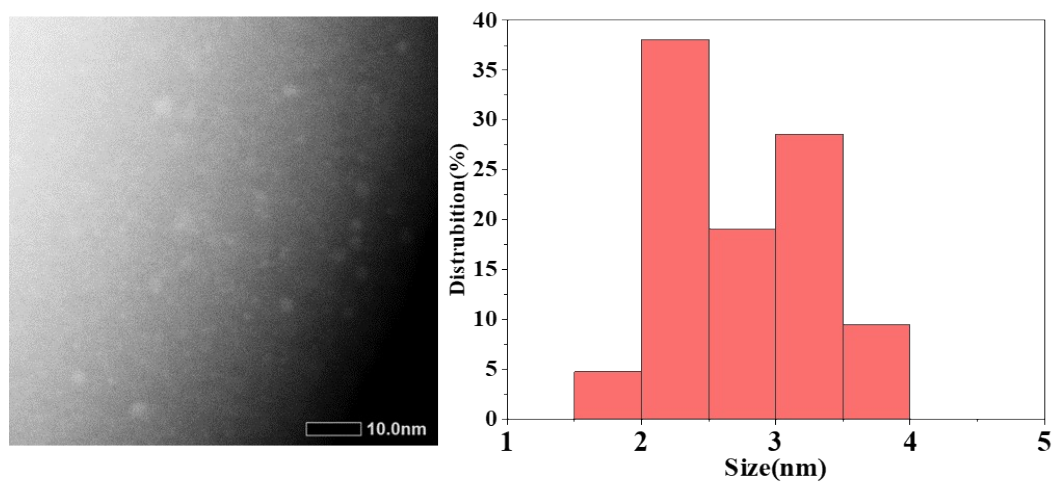

Fig. S8. HAADF-STEM image and corresponding Cu nanoparticles size distribution of the spent 1.0 Cu@S-1

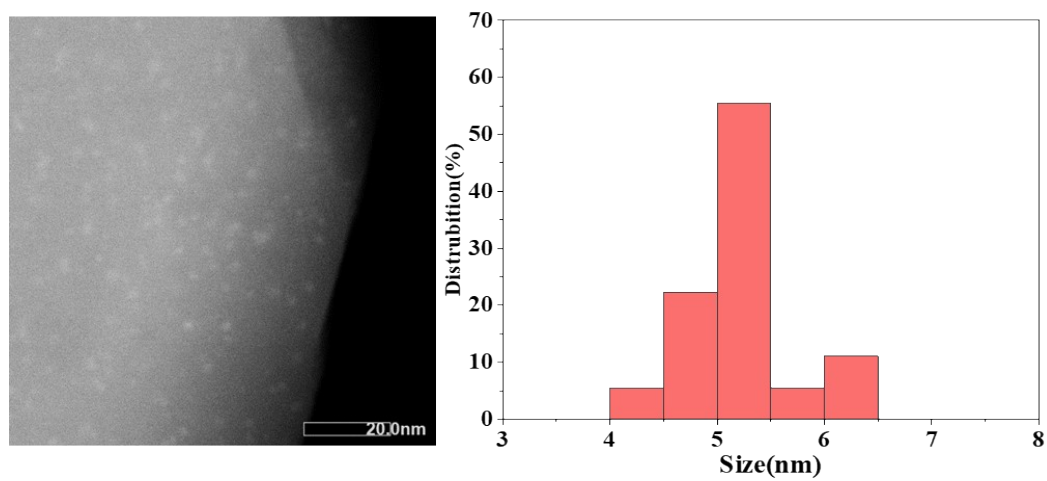

Fig. S9. HAADF-STEM image and corresponding Cu nanoparticles size distribution of the spent 1.0 Cu/S-1

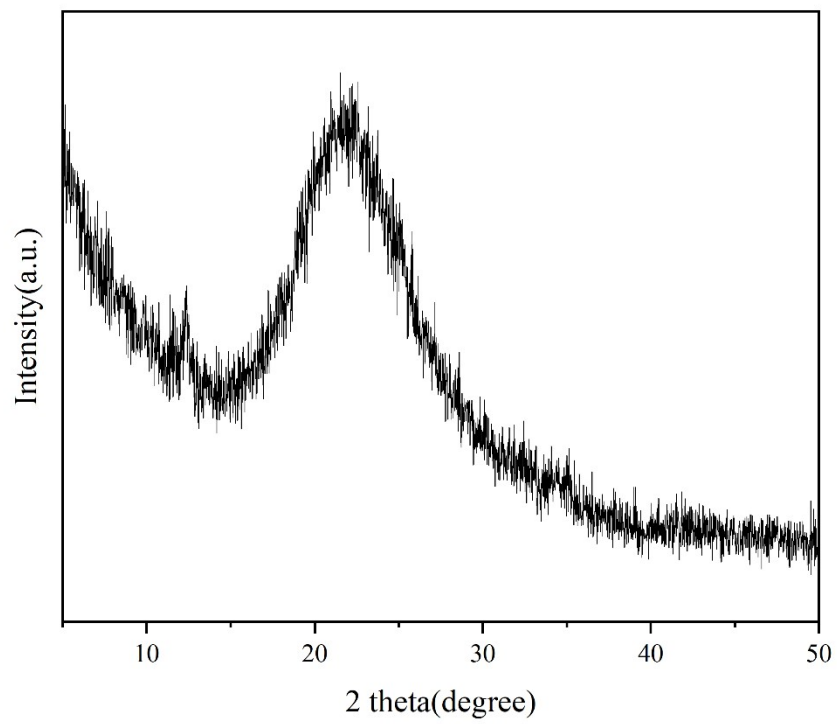

Fig. S10. The XRD pattern of the CuZnO/SiO<sub>2</sub>.

Table S1 Cu loading and BET surface of the as-synthesized catalyst

| Sample                 | Cu loading<br>wt% <sup>a</sup> | Surface area <sup>b</sup> |                    | Pore volume        |                  | D <sub>Cu</sub> (%) |
|------------------------|--------------------------------|---------------------------|--------------------|--------------------|------------------|---------------------|
|                        |                                | S <sub>BET</sub>          | S <sub>micro</sub> | V <sub>micro</sub> | V <sub>ext</sub> |                     |
| 0.25 Cu@S-1            | 0.26                           | 324                       | 227                | 0.11               | 0.08             | -                   |
| 0.50 Cu@S-1            | 0.53                           | 350                       | 228                | 0.12               | 0.08             | -                   |
| 0.75 Cu@S-1            | 0.73                           | 368                       | 246                | 0.11               | 0.08             | -                   |
| 1.0 Cu@S-1             | 1.05/1.05 <sup>c</sup>         | 356                       | 265                | 0.13               | 0.06             | 62.1                |
| 1.25 Cu@S-1            | 1.21                           | 365                       | 243                | 0.12               | 0.08             | 48.9                |
| 1.0 Cu/S-1             | 1.03                           | 358                       | 198                | 0.10               | 0.10             | 39.4                |
| CuZnO/SiO <sub>2</sub> | 1.18/1.18 <sup>d</sup>         |                           |                    |                    |                  |                     |

<sup>a</sup> Determined by XRF. <sup>b</sup> S<sub>BET</sub>: BET surface area, S<sub>micro</sub>: t-plot microporous surface area.

<sup>c</sup> Determined by ICP-OES analysis.

<sup>d</sup> the loading of Zn, determined by XRF
